# Supplementary material for: A 3D-printed hand-powered centrifuge for molecular biology
Source: bioRxiv or medRxiv preprint supplement (doi:10.1101/519835), 2019-01-16
Supplement: Supplementary file [file media-1.pdf]

# Supplementary Information - A 3D-printed hand-powered centrifuge for molecular biology

Gaurav Byagathvalli,<sup>1,\*</sup> Aaron F. Pomerantz,<sup>2,\*</sup> Soham Sinha,<sup>3</sup> Janet Standeven,<sup>1</sup> and M. Saad Bhamla<sup>3,†</sup>

<sup>1</sup>*Lambert High School, 805 Nichols Rd, Suwanee, GA, 30024, USA*

<sup>2</sup>*Department of Integrative Biology, University of California, Berkeley, CA, USA*

<sup>3</sup>*School of Chemical & Biomolecular Engineering,*

*Georgia Institute of Technology, 311 Ferst Drive NW, Atlanta, GA 30332, USA*

(Dated: January 13, 2019)

## CONTENTS

|                                                      |   |
|------------------------------------------------------|---|
| I. Supplementary Movies                              | 1 |
| A. S1: 3D-Fuge: a 3D-Printed Hand-Powered Centrifuge | 1 |
| II. Supplementary Figures                            | 1 |

## I. SUPPLEMENTARY MOVIES

### A. S1: 3D-Fuge: a 3D-Printed Hand-Powered Centrifuge

Short video demonstrating the need and applications of the 3D-Fuge both in field conditions and within high schools. The video can be viewed on Youtube at: [The 3D-Fuge](#).

## II. SUPPLEMENTARY FIGURES

---

\* authors contributed equally

† Please address correspondence to M.S.B:  
(saadb@chbe.gatech.edu)

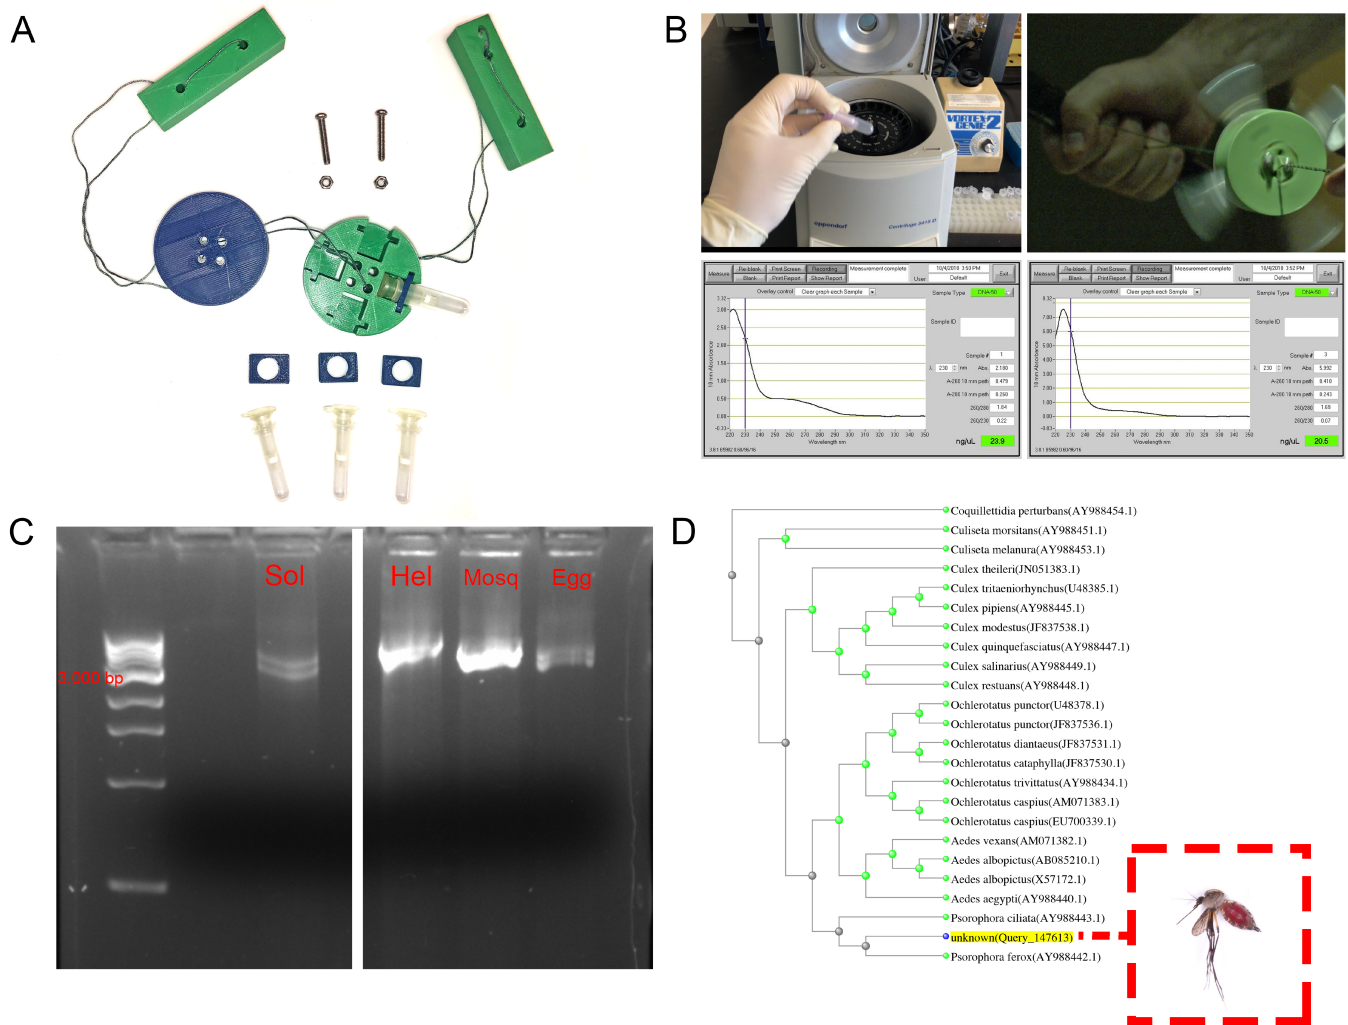

**FIG. S1. Nucleotide Extractions with 3D-Fuge.** (A) Components and 3D printed parts of the 3D-Fuge. (B) Comparison of human cheek swab DNA extractions using a conventional laboratory bench top centrifuge (left) and the 3D-Fuge (right) with their respective Nanodrop DNA quantifications. Long-range mitochondrial PCR products using these extracts can be found in Figure 1E. (C) Gel electrophoresis of samples that were extracted in the field using the 3D-Fuge and subsequently PCR amplified with ribosomal DNA primers (left to right: Solanaceae, Heliconius butterfly, Mosquito, and Butterfly eggs). (D) NCBI distance of tree results from a consensus sequence generated in the field from the bloodfed mosquito sample.
